# Supplementary material for: Variable gene transcription underlies phenotypic convergence of hypoxia tolerance in sculpins
Source: PubMed Central journal article supplement (PMC6215679; doi:10.1186/s12862-018-1275-1), 2018-11-03

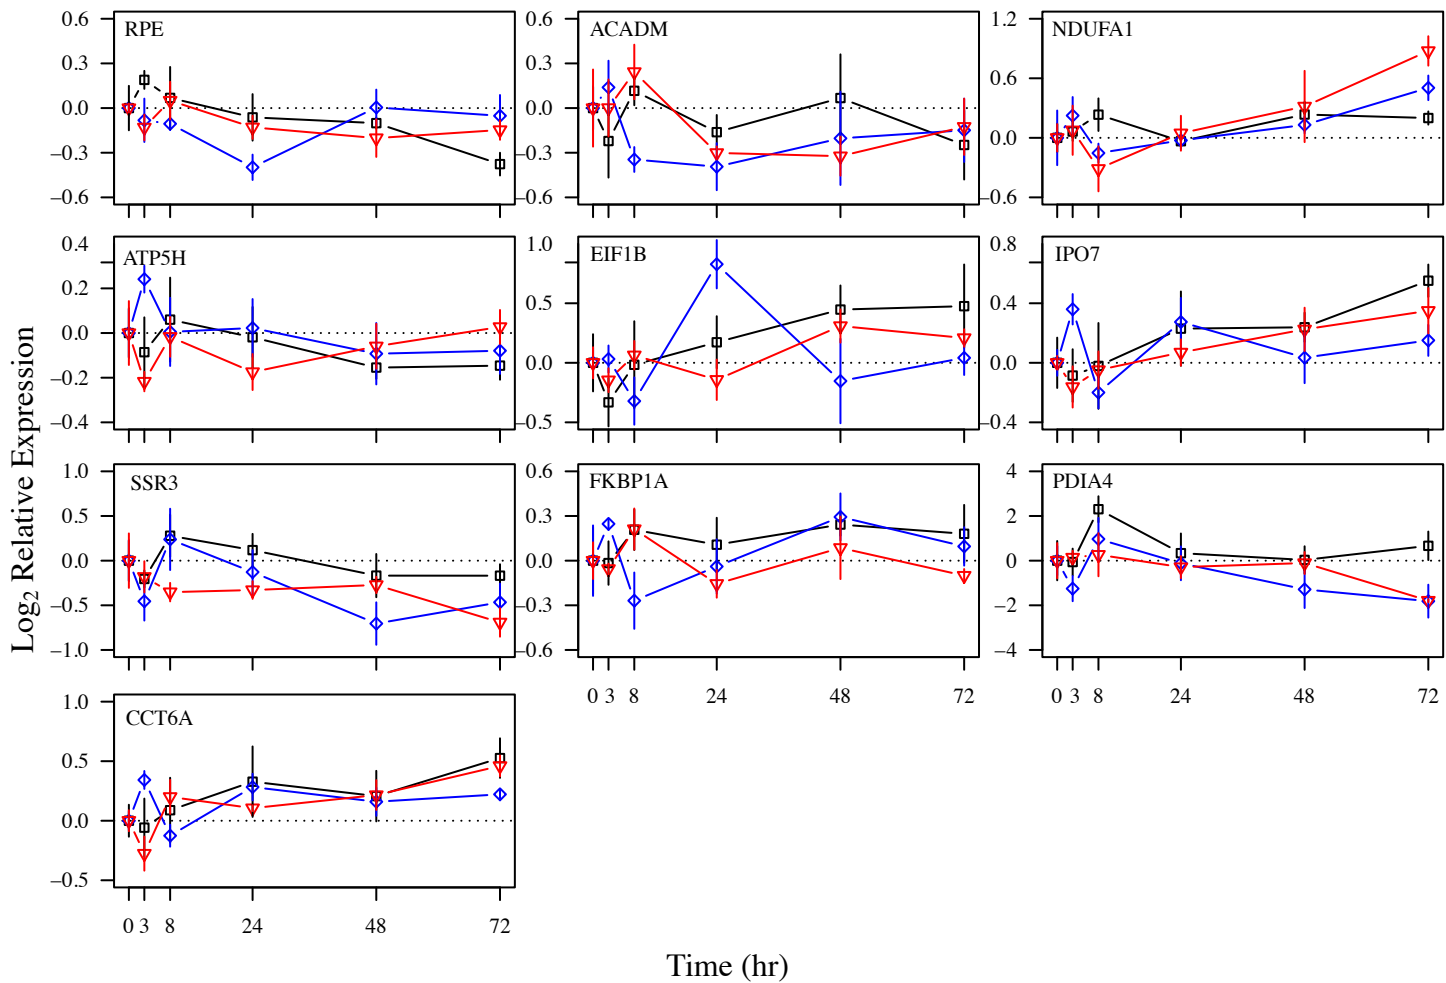

Supplement: 12862_2018_1275_MOESM4_ESM.pdf [file 12862_2018_1275_MOESM4_ESM.pdf]
